# Supplementary material for: CtpB is a plasma membrane copper (I) transporting P-type ATPase of Mycobacterium tuberculosis
Source: PubMed Central journal article supplement (PMC7017476; doi:10.1186/s40659-020-00274-7), 2020-02-13

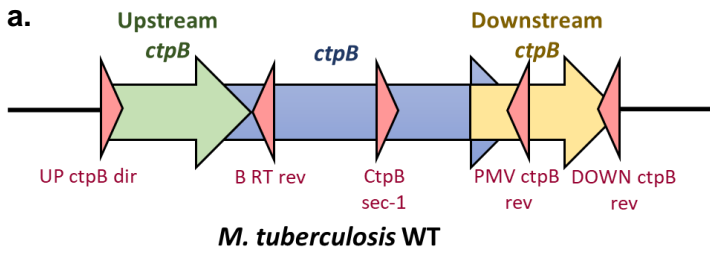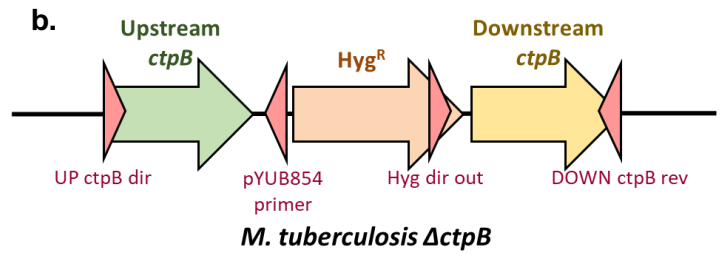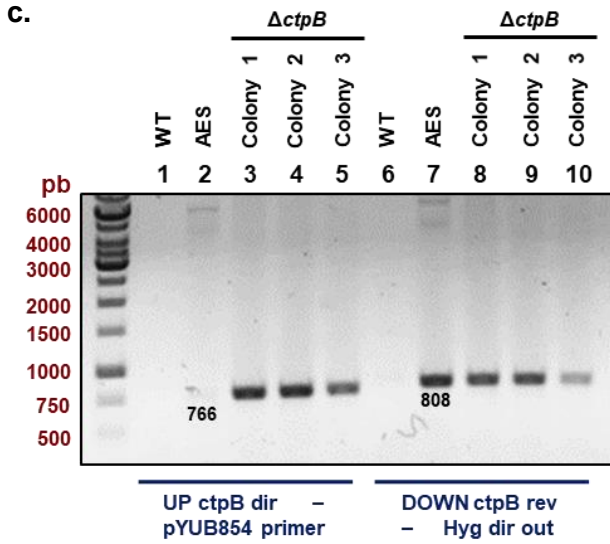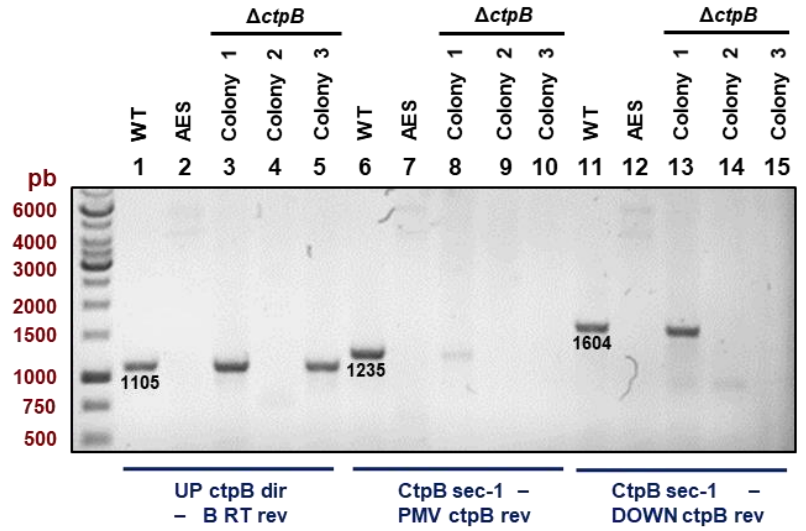

Supplement: 40659_2020_274_MOESM3_ESM.pdf [file 40659_2020_274_MOESM3_ESM.pdf]
